# Supplementary material for: Methylation Levels of SLC23A2 and NCOR2 Genes Correlate with Spinal Muscular Atrophy Severity
Source: PubMed Central journal article supplement (PMC4378931; doi:10.1371/journal.pone.0121964), 2015-03-30

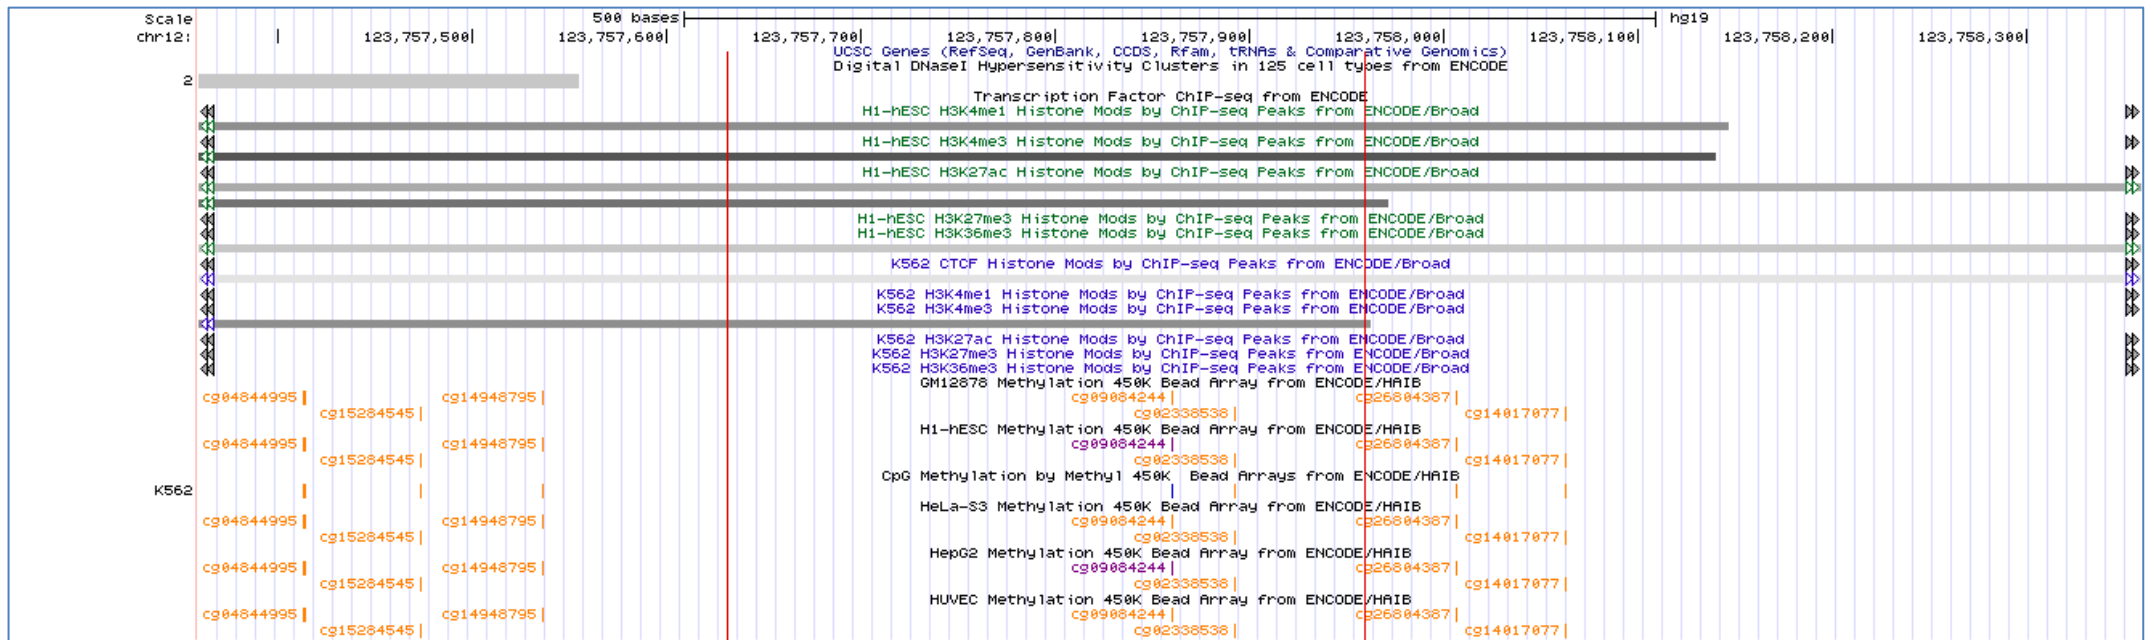

Supplement: pone.0121964.s008.pdf [file pone.0121964.s008.pdf]
